# Supplementary material for: Nano-La 2 O 3 undermines honeybee cognition by invading the brain and accelerating neuronal apoptosis
Source: Royal Society of Chemistry journal article supplement (doi:10.1039/d5en00105f), 2025-01-01
Supplement: d5en00105f1.pdf [file d5en00105f1.pdf]

*Supporting information for*

**Nano-La<sub>2</sub>O<sub>3</sub> undermines honeybee cognition by invading  
the brain and accelerating neuronal apoptosis**

Wangjiang Feng,<sup>a</sup> Yuan Ge,<sup>\*bc</sup> Patricia A. Holden,<sup>d</sup> Yongxiang Zhang,<sup>a</sup> Pingli Dai <sup>a</sup> and Yong-Jun Liu <sup>\*a</sup>

<sup>a</sup> State Key Laboratory of Resource Insects, Institute of Apicultural Research, Chinese Academy of Agricultural Sciences, Beijing 100193, China

<sup>b</sup> State Key Laboratory of Regional and Urban Ecology, Research Center for Eco-Environmental Sciences, Chinese Academy of Sciences, Beijing 100085, China

<sup>c</sup> University of Chinese Academy of Sciences, Beijing 101408, China

<sup>d</sup> Bren School of Environmental Science & Management, University of California, Santa Barbara, California 93106, USA

\* Corresponding authors:

yuange@rcees.ac.cn (Y. Ge)

liuyongjun@caas.cn (Y. Liu)

**Summary information:**

Number of pages: 5

Supplementary Tables: Table S1-2

Supplementary Figures: Fig. S1-2

**Table S1 The sample size in different experiments of this study**

| Experiment         | Group    |          |          |          |          |          | Sample   |
|--------------------|----------|----------|----------|----------|----------|----------|----------|
|                    | T0       | T1       | T10      | T100     | T500     | T1000    |          |
| Sucrose perception | 25/25/26 | 30/30/32 | 24/24/23 | 18/18/18 | 18/18/18 | 18/18/17 | Honeybee |
| Learning           | 24/24/24 | 30/30/29 | 22/22/22 | 18/18/17 | 15/15/14 | 18/18/16 | Honeybee |
| Memory             | 21/22/22 | 28/25/23 | 19/19/16 | 14/15/12 | 12/10/12 | 13/11/13 | Honeybee |

**Table S2 The primer sequences for RT-qPCR**

| Gene                                                   | Abbreviation     | Primer sequences (5'-3')                       | Accession number |
|--------------------------------------------------------|------------------|------------------------------------------------|------------------|
| <i>caspase-1</i>                                       | <i>caspase-1</i> | AACTGATGGTCAACCAGCTTC<br>CGCGAGTGGTATTTCTCCAT  | XM_395697.7      |
| <i>caspase-3</i>                                       | <i>caspase-3</i> | TCGTTACGCCAAAAGATTCC<br>GTCCCGTTTCGTTGTGATTC   | XM_394855.6      |
| <i>cAMP-dependent<br/>protein kinase</i>               | <i>pka</i>       | ACAAGTGGTTCGCCAGTACC<br>GTGTCTCCTGGCCCTTTACA   | XM_393285.7      |
| <i>cAMP-responsive<br/>element binding<br/>protein</i> | <i>creb</i>      | AATTGCAACCCAAGGTGAAG<br>CTTGGCCTTGTGCATACTGA   | XM_006570049.3   |
| <i>n-methyl-D-aspartate<br/>receptor 1</i>             | <i>nmdar1</i>    | AAATGCGCAAGCAAGAGTTT<br>GCTTGCTCTGTCACAATCCA   | NM_001011573.1   |
| <i>vitellogenin</i>                                    | <i>vg</i>        | GAGAAACGTGATCAGCGACA<br>TGGATCGTGCAATGTTTGTT   | NM_001011578.1   |
| <i>catalase</i>                                        | <i>cat</i>       | GAGCTGGTGCATTCGGTTAT<br>CGCCACCCACAGTAGAAAAT   | NM_001178069.1   |
| <i>apidaecin 1</i>                                     | <i>apid1</i>     | TGAAGAATTTTGCCTTAGCAAT<br>AGGTCGAGTAGGCGGATCTA | NM_001011613.1   |
| <i>ribosomal protein L32</i>                           | <i>rpl32</i>     | TGAAGAATTTTGCCTTAGCAAT<br>AGGTCGAGTAGGCGGATCTA | NM_001011587.1   |

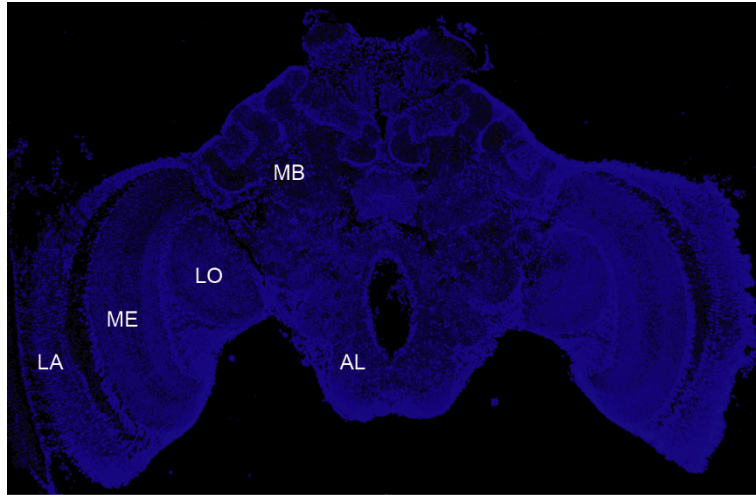

**Fig. S1 The anatomical diagram of the honeybee brain.** MB, mushroom body; AL, antennal lobe; LO, lobula; ME, medulla; LA, lamina.

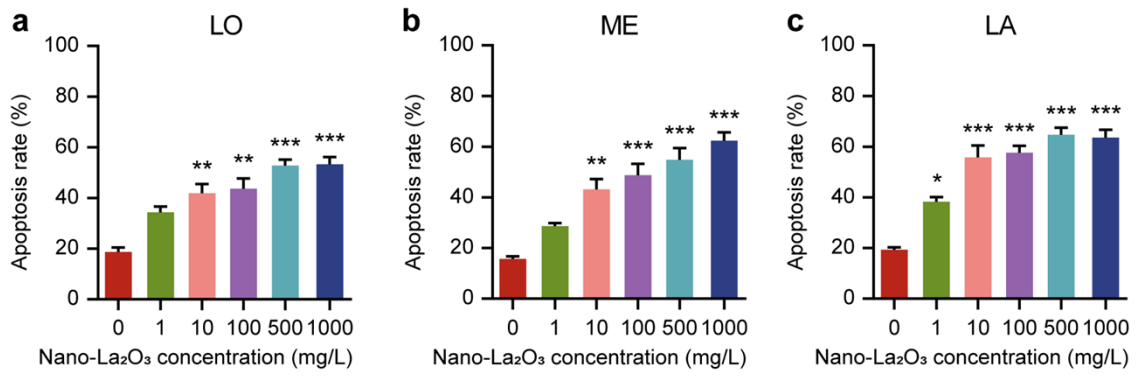

**Fig. S2 Nano-La<sub>2</sub>O<sub>3</sub> treatment increased apoptosis in honeybee optic lobe neurons.** The apoptosis rate of optic lobes (OLs), including (A) lobula (LO), (B) medulla (ME), and (C) lamina (LA), in honeybees treated with different concentrations of nano-La<sub>2</sub>O<sub>3</sub>. Data were from five honeybee brains and presented as mean ± standard error of the mean (sem). Statistical analysis was performed by one-way ANOVA with Dunnett's multiple comparisons (\*  $p < 0.05$ , \*\*  $p < 0.01$ , \*\*\*  $p < 0.001$ ).
